# Supplementary material for: Demographic predictors of bedtime procrastination in the Japanese population
Source: Springer Nature journal article supplement (doi:10.1007/s41105-023-00508-7), 2024-01-18
Supplement: MOESM1 [file 26639816]

**Supplementary Material** The Japanese version of Bedtime Procrastination Scale

次のそれぞれの質問について、あなたにあてはまる程度を 1（ほとんどない）から 5（ほとんどいつも）の間で選んでください。

| Item                            | ほとんどない | あまりない | ときどきある | かなりある | ほとんどいつも |
|---------------------------------|--------|-------|--------|-------|---------|
| 1 寝床に入るつもりだった時間よりも、遅く寝床に入る。     | 1      | 2     | 3      | 4     | 5       |
| 2 朝早く起きなければならないとき、早く寝床に入る。      | 1      | 2     | 3      | 4     | 5       |
| 3 夜、消灯する時間になったら、すぐに消灯する。        | 1      | 2     | 3      | 4     | 5       |
| 4 寝床に入る時間なのに、まだ他のことをしていることが多い。  | 1      | 2     | 3      | 4     | 5       |
| 5 本当に寝床に入りたいのに、他のことで簡単に気が散る。    | 1      | 2     | 3      | 4     | 5       |
| 6 寝床に入るべき時間に入らない。               | 1      | 2     | 3      | 4     | 5       |
| 7 一定の寝床に入る時間を守っている。             | 1      | 2     | 3      | 4     | 5       |
| 8 寝床に入るべき時間に入りたいが、単にそうしない。      | 1      | 2     | 3      | 4     | 5       |
| 9 寝床に入る時間になったら、活動を簡単にやめることができる。 | 1      | 2     | 3      | 4     | 5       |

Note) Among the individual MSA indices for each item, item 2 showed an insufficient MSA value (MSA = .45 in Sample 1 at Time 1). However, as the exclusion of item 2 did not make a large difference in findings, item 2 was included in the Japanese version of Bedtime Procrastination Scale.
